# Supplementary material
Source: publisher site journal article supplement (https://static.cambridge.org/content/id/urn:cambridge.org:id:article:S0007114519000606/resource/name/S0007114519000606supp003.pdf)
Supplement: Supplementary file 1 [file S0007114519000606supp003.pdf]

**Supplementary Table S2.** Validation study: median daily intakes of energy and carotenoids based on the average of two FFQs and the average of three 24-h recalls; Pearson correlation coefficients between FFQs and 24-h recalls completed by 123 pregnant Chinese women from the TMCHC study

(Medians and interquartile ranges or pearson correlation coefficients)

| Carotenoids            | Average of two FFQ |              | Average of three 24HR FFQ/24HR |               |            | Pearson correlation coefficients * |                 |                                   | <i>P</i> † |
|------------------------|--------------------|--------------|--------------------------------|---------------|------------|------------------------------------|-----------------|-----------------------------------|------------|
|                        | Median             | P25,P75      | Median                         | P25,P75       | Median (%) | Un-adjusted                        | Energy-adjusted | Energy-adjusted and de-attenuated |            |
| Energy (kcal)          | 1735               | 1478, 1994   | 1705                           | 1445, 1983    | 102        | 0.55                               | -               | -                                 |            |
| a-carotene (mg)        | 0.243              | 0.133, 0.587 | 0.124                          | 0.064, 0.353‡ | 196        | 0.33                               | 0.28            | 0.33                              | 0.002      |
| β-carotene (mg)        | 2.456              | 1.704, 3.217 | 1.827                          | 1.096, 2.555  | 155        | 0.38                               | 0.32            | 0.37                              | <0.001     |
| β-cryptoxanthin (mg)   | 0.205              | 0.104, 0.356 | 0.139                          | 0.026, 0.374  | 152        | 0.38                               | 0.34            | 0.41                              | <0.001     |
| Lycopene (mg)          | 1.941              | 1.068, 4.526 | 1.467                          | 0.012, 3.703  | 132        | 0.48                               | 0.42            | 0.45                              | <0.001     |
| Lutein/zeaxanthin (mg) | 1.963              | 1.311, 2.868 | 1.613                          | 0.701, 2.750‡ | 140        | 0.38                               | 0.35            | 0.40                              | <0.001     |

\* Values were based on log-transformation.

† *P* value of energy adjusted Pearson correlation coefficients between average intakes of two FFQs and three 24-h recalls.

‡ *P*<0.05, compared with average intakes estimated by two FFQ using Wilcoxon's signed rank test.
